# Supplementary material for: Conformational equilibrium and internal dynamics in the iso-propanol–water dimer
Source: Royal Society of Chemistry journal article supplement (doi:10.1039/c6cp06315b), 2016-11-22

## **Conformational equilibrium and internal dynamics in the *iso*-propanol-water dimer**

### **Electronic Supplementary Information**

Content:

- 2 Tables of experimental transition frequencies
- 1 Table of MP2/6-311++G(d,p) principal axes coordinates (Å) with the *ab initio* geometry of the observed conformer, and related sketch.

Table S1. Experimental transition frequencies ( $\nu$ , MHz) of the parent and 4 isotopologues of the *GAI* conformer of isopropanol-water.

| $J'(K_a', K_c') \leftarrow J''(K_a'', K_c'')$ | $\nu=0$    | $\nu=1$    |
|-----------------------------------------------|------------|------------|
| 2(0,2)-1(0,1)                                 | 9672.9654  | 9669.6825  |
| 2(1,2)-1(1,1)                                 | 9545.6430  | 9543.8442  |
| 2(1,1)-1(1,0)                                 | 9808.6429  | 9807.2838  |
| 3(0,3)-2(0,2)                                 | 14496.9525 | 14492.0836 |
| 3(1,3)-2(1,2)                                 | 14312.3465 | 14315.0518 |
| 3(1,2)-2(1,1)                                 | 14709.4494 | 14707.3279 |
| 1(1,0)-0(0,0)                                 | 7583.8126  | 7584.4518  |
| 2(1,1)-1(0,1)                                 | 12553.4666 | 12554.3665 |
| 2(2,1)-1(1,1)                                 | 17779.5465 | 17784.4985 |
| 2(2,0)-1(1,0)                                 | 17652.8346 | 17657.6237 |
| 2(2,0)-2(1,2)                                 | 8238.6908  | 8245.5163  |
| 2(2,1)-2(1,1)                                 | 7839.4106  |            |
| 3(0,3)-2(1,1)                                 | 11616.4511 | 11607.3970 |
| 3(1,2)-2(0,2)                                 | 17589.9498 | 17592.0134 |
| 3(2,1)-3(1,3)                                 | 8454.6958  | 8471.4178  |
| 3(2,2)-3(1,2)                                 | 7641.9066  |            |
| 4(0,4)-3(1,2)                                 | 16213.1693 | 16200.3656 |
| 5(2,3)-5(1,5)                                 | 9193.3173  |            |

Table S2. Experimental transition frequencies ( $\nu$ , MHz) of the parent and 4 isotopologues of the *GAO* conformer of isopropanol-water.

| $J'(K_a', K_c') \leftarrow J''(K_a'', K_c'')$ | IP--H <sub>2</sub> O | P--H <sub>2</sub> <sup>18</sup> O | IP--DOH    | IP--HOD    | IP--<br>D <sub>2</sub> O |
|-----------------------------------------------|----------------------|-----------------------------------|------------|------------|--------------------------|
| 1(1,1)-0(0,0)                                 | 9663.4408            | 9566.4109                         | 9626.7537  | 9538.0977  |                          |
| 1(1,0)-0(0,0)                                 | 9967.7738            | 9837.8428                         |            |            |                          |
| 2(0,2)-1(0,1)                                 | 7577.3284            | 7160.8101                         | 7480.8164  | 7275.3624  | 7185.5180                |
| 2(1,2)-1(0,1)                                 | 13153.6133           | 12879.9932                        | 13075.1366 | 12902.7078 |                          |
| 2(1,2)-1(1,1)                                 | 7284.6824            | 6898.5838                         | 7194.3707  | 7007.1821  |                          |
| 2(1,1)-1(0,1)                                 | 13153.6133           |                                   |            |            |                          |
| 2(1,1)-1(1,0)                                 | 7893.3304            | 7441.4085                         | 7789.5391  | 7563.1586  |                          |
| 3(0,3)-2(0,2)                                 | 11336.8526           | 10718.2997                        | 11193.3981 | 10888.6704 | 10754.9739               |
| 3(1,3)-2(1,2)                                 | 10919.5307           | 10341.9229                        | 10784.4189 | 10504.4255 | 10377.7389               |
| 3(1,2)-2(1,1)                                 | 11832.1992           | 11155.9409                        | 11676.8869 | 11338.1684 | 11194.5952               |
| 3(2,2)-2(2,1)                                 | 11383.7359           |                                   |            |            |                          |
| 3(2,1)-2(2,0)                                 | 11429.7388           |                                   |            |            |                          |
| 4(0,4)-3(0,3)                                 | 15062.0568           | 14248.6851                        | 14873.1901 |            | 14296.8917               |
| 4(1,4)-3(1,3)                                 |                      | 13778.3909                        |            | 13994.3683 | 13826.0189               |
| 4(1,3)-3(1,2)                                 | 15761.3331           | 14862.8111                        | 15554.9606 | 15104.9914 | 14914.1840               |
| 4(2,3)-3(2,2)                                 | 15168.5536           |                                   |            |            |                          |
| 4(2,2)-3(2,1)                                 | 15282.8167           |                                   |            |            |                          |
| 5(0,5)-4(0,4)                                 |                      | 17744.1676                        | 18511.0642 | 18020.7238 | 17803.3600               |
| 5(1,5)-4(1,4)                                 |                      | 17206.1246                        | 17937.7212 | 17475.0502 | 17265.4669               |
| 5(1,4)-4(1,3)                                 |                      | 18559.0192                        |            |            |                          |

Table S3. MP2/6-311++G(d, p) geometry of the observed conformer of the *GAI* conformer of Isopropanol-water

| bond lengths/Å |        | angles/° |       | dihedral angle/° |        |
|----------------|--------|----------|-------|------------------|--------|
| C2C1           | 1.5225 |          |       |                  |        |
| O3C2           | 1.4428 | O3C2C1   | 106.4 |                  |        |
| C4C2           | 1.5179 | C4C2O3   | 110.5 | C4C2O3C1         | -122.4 |
| O5O3           | 2.8537 | O5O3C2   | 106.5 | O5O3C2C1         | 60.5   |
| H6O3           | 0.9630 | H6O3C2   | 107.4 | H6O3C2C1         | 179.6  |
| H7C2           | 1.0984 | H7C2O3   | 108.3 | H7C2O3O5         | 177.9  |
| H8C1           | 1.0937 | H8C1C2   | 110.0 | H8C1C2C4         | -62.4  |
| H9C1           | 1.0930 | H9C1C2   | 110.3 | H9C1C2C4         | 177.7  |
| H10C1          | 1.0937 | H10C1C2  | 110.0 | H10C1C2C4        | 57.4   |
| H11C4          | 1.0944 | H11C4C2  | 110.3 | H11C4C2C1        | 61.1   |
| H12C4          | 1.0956 | H12C4C2  | 111.0 | H12C4C2C1        | -179.3 |
| H13C4          | 1.0939 | H13C4C2  | 109.9 | H13C4C2C1        | -59.1  |
| H14O5          | 0.9688 | H14O5O3  | 8.3   | H14O5O3C2        | -146.3 |
| H15O5          | 0.9590 | H15O5O3  | 112.2 | H15O5O3C2        | -141.0 |

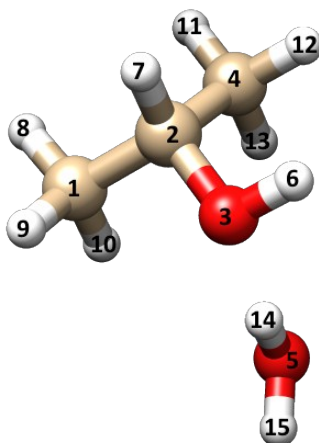

Table S4. MP2/6-311++G(d, p) geometry of the observed conformer of the *GAO* conformer of Isopropanol-water

| bond lengths/Å |        | angles/° |       | dihedral angle/° |        |
|----------------|--------|----------|-------|------------------|--------|
| C2C1           | 1.5213 |          |       |                  |        |
| O3C2           | 1.4418 | O3C2C1   | 110.3 |                  |        |
| C4C2           | 1.5176 | C4C2O3   | 106.3 | C4C2O3C1         | -122.4 |
| O5O3           | 2.8602 | O5O3C2   | 109.4 | O5O3C2C1         | 178.3  |
| H6O3           | 0.9629 | H6O3C2   | 107.5 | H6O3C2C1         | -53.6  |
| H7C2           | 1.0985 | H7C2O3   | 108.6 | H7C2O3O5         | -61.6  |
| H8C1           | 1.0941 | H8C1C2   | 110.4 | H8C1C2C4         | -61.6  |
| H9C1           | 1.0955 | H9C1C2   | 111.1 | H9C1C2C4         | 178.8  |
| H10C1          | 1.0939 | H10C1C2  | 109.9 | H10C1C2C4        | 58.6   |

|       |        |         |       |           |        |
|-------|--------|---------|-------|-----------|--------|
| H11C4 | 1.0936 | H11C4C2 | 110.0 | H11C4C2C1 | 60.8   |
| H12C4 | 1.0923 | H12C4C2 | 109.8 | H12C4C2C1 | -58.8  |
| H13C4 | 1.0943 | H13C4C2 | 110.5 | H13C4C2C1 | -179.0 |
| H14O5 | 0.9684 | H14O5O3 | 5.6   | H14O5O3C2 | -164.8 |
| H15O5 | 0.9589 | H15O5O3 | 109.0 | H15O5O3C2 | -144.6 |

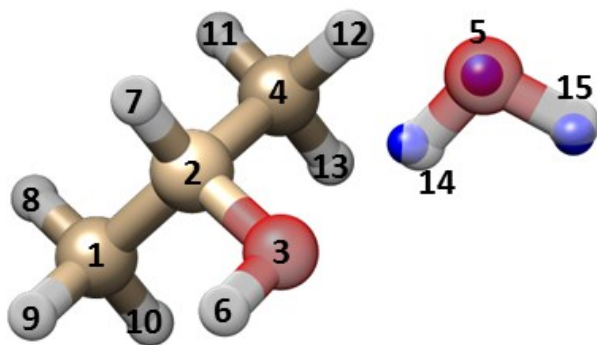

Supplement: c6cp06315b1.pdf [file c6cp06315b1.pdf]
